# Supplementary material for: Electrochemical Performance of Metal-Free Carbon-Based Catalysts from Different Hydrothermal Carbonization Treatments for Oxygen Reduction Reaction
Source: MDPI journal article supplement (doi:10.3390/nano14020173), 2024-01-12
Supplement: s1 [file s1]

## SUPPORTING INFORMATION

### **Electrochemical Performance of Metal-Free Carbon-Based Catalysts from Different Hydrothermal Carbonization Treatments for Oxygen Reduction Reaction**

**Aldo Girimonte <sup>1</sup>, Andrea Stefani <sup>2</sup>, Clara Mucci <sup>1</sup>, Roberto Giovanardi <sup>1</sup>, Andrea Marchetti <sup>3</sup>, Massimo Innocenti <sup>4,5</sup>, and Claudio Fontanesi <sup>1,5\*</sup>**

<sup>1</sup>University of Modena and Reggio Emilia, Department of Engineering, DIEF, via vivarelli 10, 41125 Modena, ITALY;

<sup>2</sup>University of Modena and Reggio Emilia, Department of Physics, FIM, via Campi 213, 41125 Modena, ITALY

<sup>3</sup>University of Modena and Reggio Emilia, Department of Chemical and Geological Science, DSCG, via Campi 103, 41125 Modena, ITALY

<sup>4</sup>University of Firenze, Department of Chemistry, “Ugo Schiff”, via della Lastruccia 3, 50019 Sesto Fiorentino, ITALY

<sup>5</sup>National Interuniversity Consortium of Materials Science and Technology (INSTM), Via G. Giusti 9, 50121 Firenze, ITALY

\*Correspondence: claudio.fontanesi@unimore.it

#### **Impedance results**

For the sake of comparison impedance spectra are here reported for “**dry**” nanospheres obtained by using the traditional hydrothermal procedure (T-HTC) as well as the MicroWave-assisted HTC (MW-HTC) synthetic route. These data must be compared with impedance spectra reported in Figure 5 in the main manuscript.

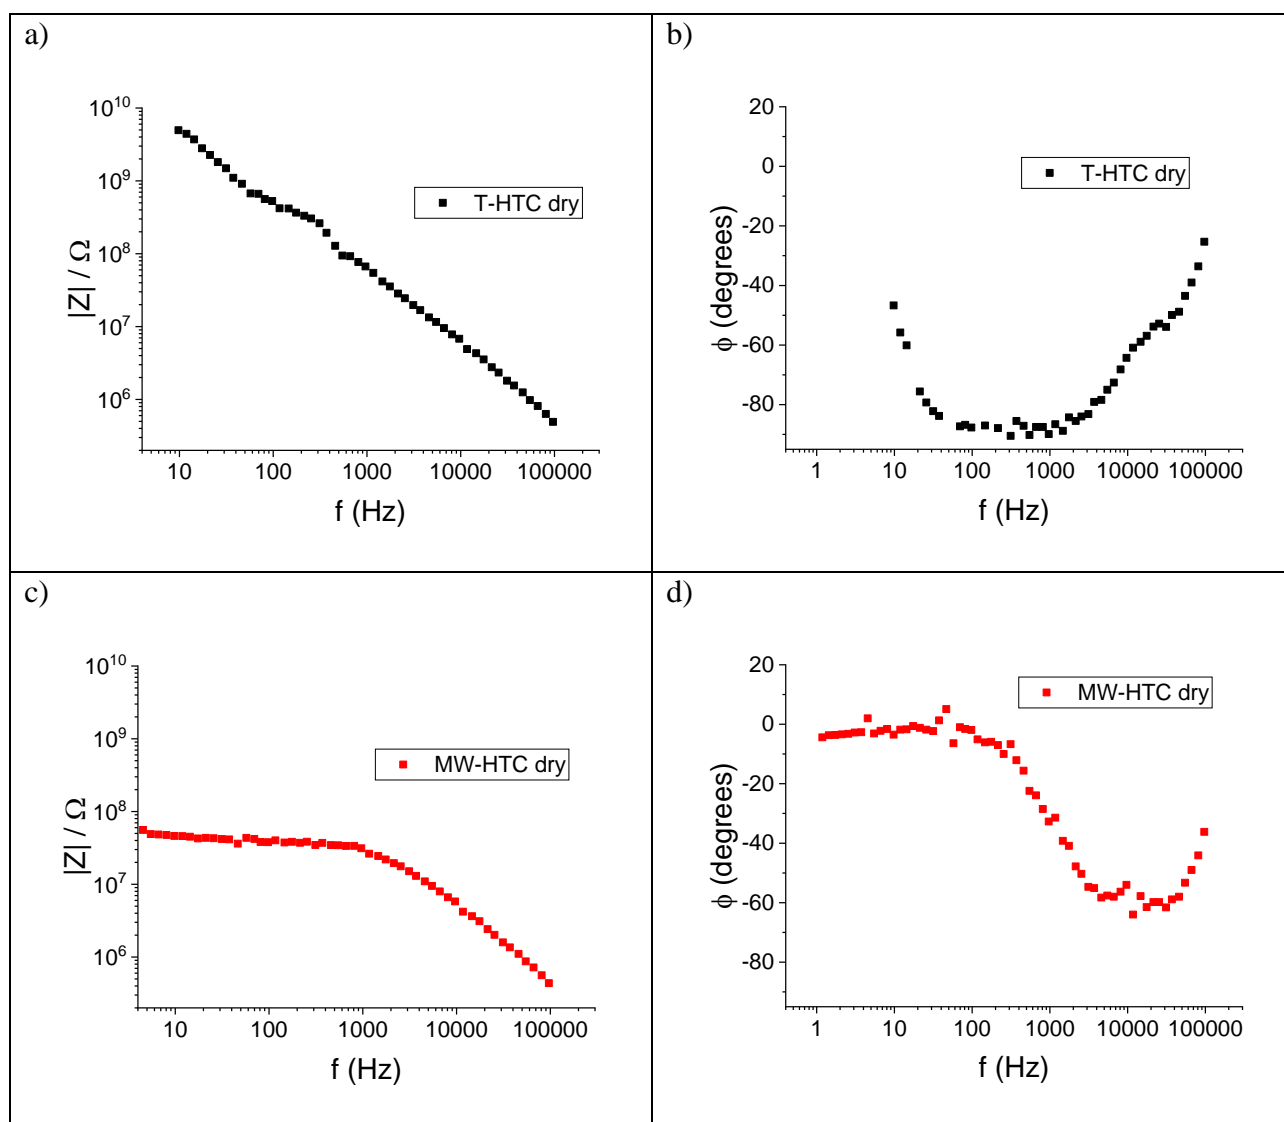

Figure S1. Impedance spectra recorded in the 100 kHz to 1 Hz frequency range, Bode representation, are here reported for the glucose nanospheres in the dry state. a) sets out the impedance absolute value as a function of the frequency concerning the particles obtained via traditional hydrothermal synthetic route. b) sets out the phase as a function of the frequency. c) sets out the impedance absolute value as a function of the frequency concerning the particles obtained via microwave synthetic route. d) sets out the phase as a function of the frequency.

Remarkably the impedance of the T-HTC particles is higher than that of the MW-HTC ones. The latter are characterized by a resistive electric behaviour in the low frequency limit (the phase in Figure S1d is close to zero and almost constant in the 1 to 1000 Hz frequency range. Interestingly, the impedance spectra of the ink, a situation which resembles more closely the solution environment, show a different behaviour. The T-HTC particles are characterized by a lower value of impedance with respect to MW-HTC ones (compare Figure 5 of the main manuscript).
